# Supplementary material
Source: Springer Nature journal article supplement (https://www.springermedizin.de/resource/supplementary/13054_2011_9763_MOESM6_ESM.pdf/9706982)

**A**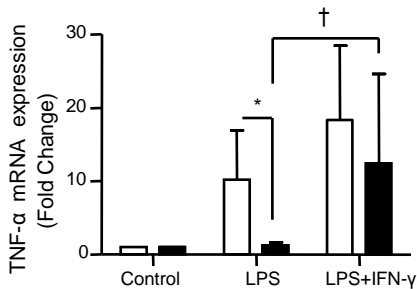**B**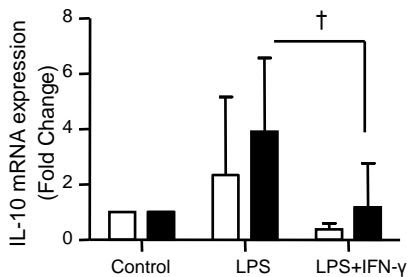**C**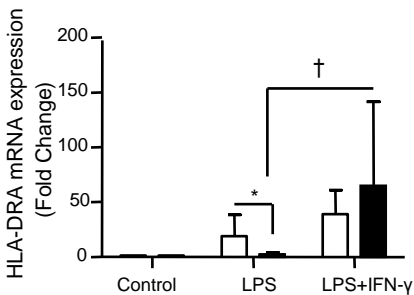**D**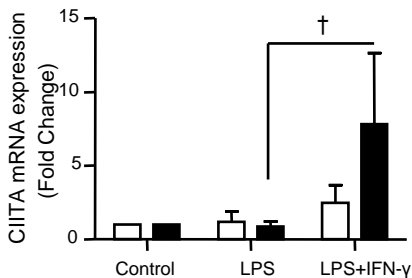**E**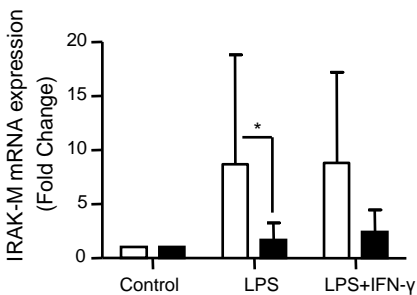**F**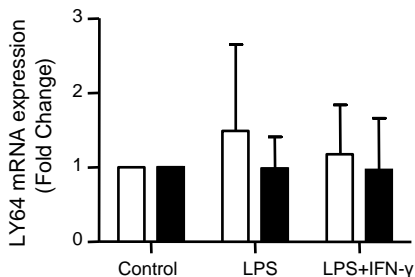

Supplement: MOESM6 [file 9706982]
